# Supplementary material for: Cavitons and spontaneous hot flow anomalies in a hybrid-Vlasov global magnetospheric simulation
Source: Copernicus journal article supplement (doi:10.5194/angeo-36-1081-2018), 2018-08-08
Supplement: Supplementary file 1 [file angeo-36-1081-2018-supplement.zip]

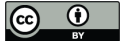

*Supplement of*

**Cavitons and spontaneous hot flow anomalies in a hybrid-Vlasov  
global magnetospheric simulation**

**Xochitl Blanco-Cano et al.**

*Correspondence to:* Xochitl Blanco-Cano (xbc@geofisica.unam.mx)

- [angeo-36-1081-2018-supplement-title-page.pdf](#)
- [BCQ\\_movingbox3\\_rho\\_1500.mp4](#)

The copyright of individual parts of the supplement might differ from the CC BY 4.0 License.
